# Supplementary material for: Experimental evidence that thermal selection shapes mitochondrial genome evolution
Source: PubMed Central journal article supplement (PMC6015072; doi:10.1038/s41598-018-27805-3), 2018-06-22
Supplement: 41598_2018_27805_MOESM1_ESM.pdf [file 41598_2018_27805_MOESM1_ESM.pdf]

**Experimental evidence that thermal selection shapes mitochondrial genome evolution**

Zdeněk Lajbner <sup>1\*</sup>, Reuven Pnini <sup>1</sup>, M. Florencia Camus <sup>2,3</sup>, Jonathan Miller <sup>1</sup>, Damian K. Dowling <sup>2</sup>

<sup>1</sup> Physics and Biology Unit, Okinawa Institute of Science and Technology Graduate University (OIST), 1919-1 Tancha, Onna-son, Okinawa 904-0945, Japan,

<sup>2</sup> School of Biological Sciences, Monash University, Clayton, Victoria 3800, Australia,

<sup>3</sup> Department of Genetics, Evolution & Environment, University College London, London WC1E 6BT, UK.

\*Correspondence: Zdeněk Lajbner, Physics and Biology Unit, Okinawa Institute of Science and Technology Graduate University (OIST), 1919-1 Tancha, Onna-son, Okinawa 904-0945, Japan. Phone: +81-(0)98-966-8684, Fax: +81-(0)98-966-1063, Email: [z.lajbner@seznam.cz](mailto:z.lajbner@seznam.cz)

Emails: [reuven.pnini@oist.jp](mailto:reuven.pnini@oist.jp), [f.camus@ucl.ac.uk](mailto:f.camus@ucl.ac.uk), [jm@oist.jp](mailto:jm@oist.jp), [damian.dowling@monash.edu](mailto:damian.dowling@monash.edu)

**Contents**

|                                                                                    |           |
|------------------------------------------------------------------------------------|-----------|
| <b>Appendix S1: Detailed methods</b>                                               | <b>2</b>  |
| <b>Supplementary Table S1: Fly food composition</b>                                | <b>7</b>  |
| <b>Supplementary Table S2: List of samples</b>                                     | <b>8</b>  |
| <b>Supplementary Table S3: Foundation dates of experimental populations</b>        | <b>11</b> |
| <b>Supplementary Table S4: Propagation of experimental populations in dates</b>    | <b>13</b> |
| <b>Supplementary Table S5: Selected SNPs characteristics for mtDNA haplogroups</b> | <b>14</b> |

## Appendix S1: Detailed methods

Calculations were executed in MATLAB R2014a (MathWorks, Inc., Natick, USA).

Let  $f_0$  be the initial frequency of B mtDNA haplogroup, and  $f_k$  ( $k = 1, 2, \dots, K$ ) its frequencies after  $k$  generations. The frequencies of two successive generations of selection are related by [45]:  $f_{k+1} = f_k(1 + s)/(1 + sf_k)$  (1)

where  $s$  is the selection coefficient. In the case of ATB, we have  $f_0 = 0.531 \pm 0.016$  and  $f_{fin} = f_0 + \theta_i$  where  $\theta_i$  ( $i = 1, 2, 3, 4$ ) is the frequency difference for the four thermal regimes (19°C, 25°C, fluctuating-cold, fluctuating-warm) respectively. Iterating equation (1) according to the number of generations ( $K=3$  generations for the colder regimes, and  $K=7$  for the warmer ones) and solving for  $s$  in terms of the initial and final frequencies, we find the results shown in Table A1 (Figs 4 and A1).

In order to evaluate a role of genetic drift in our experiment, we need to estimate female effective population sizes ( $N_{ef}$ ). Population census size ( $N_c$ ) did not fluctuate across generations in our experiment. We kept the constant population size over the whole experiment, in all thermal treatments, by trimming to ~500 eggs. Assuming an equal sex ratio, ~250 eggs would have produced females, in each of the discrete generations in our experiment. Except for the thermal treatment, all other conditions (densities, nutrition) provided to the populations were standardized and optimal (i.e. not stressful), and thus we expect that the female effective population size ( $N_{ef}$ ) may well have approached 250 under these conditions. For example, Buri [86] measured  $N_e$  empirically in his small *Drosophila* populations and found the ratio  $N_e/N_c \sim 0.56-0.71$ . We come to  $N_{ef} \sim 140-178$  by using the same ratio for our experimental populations of females ( $N_f \sim 250$ ). The effective population size can be also estimated using the neutral Wright-Fisher model in terms of the empirical variance [87]. The results are very low in FA group,  $N_e = (97, 73)$  for the fluctuating-cold and

fluctuating-warm thermal regimes respectively. The estimate is very strict, but Nunney [88] already concluded that special circumstances are required for  $N_e/N_c \ll 0.5$ , such as selection. We then calculated the expected genetic drift according to the neutral Wright-Fisher model [46] using the strict  $N_e$  estimates. We confirm that our experiment lays well within the diffusive regime and far from fixation (Fig. A2a). We verified by simulations and diffusive calculations that the genetic drift can be safely neglected in fluctuating-warm (Fig. A2b;  $P=0.005$ ) and fluctuating-cold ( $P=0.035$ ) thermal regimes.

| thermal regime   | 19            | 25             | cold          | warm           |
|------------------|---------------|----------------|---------------|----------------|
| parental freq.   | 0.5306±0.0161 | 0.5306±0.0161  | 0.5306±0.0161 | 0.5306±0.0161  |
| final freq.      | 0.5714±0.0277 | 0.4800±0.0485  | 0.5907±0.0301 | 0.3829±0.0517  |
| freq. difference | 0.0409±0.0354 | -0.0506±0.0537 | 0.0601±0.0324 | -0.1477±0.0464 |
| # of generations | 3             | 7              | 3             | 7              |
| s                | 0.0566±0.0528 | -0.0285±0.0303 | 0.0849±0.0503 | -0.0821±0.0256 |

**Table A1: Selection coefficients (s) inferred for ATB group according to the haploid selection model.**

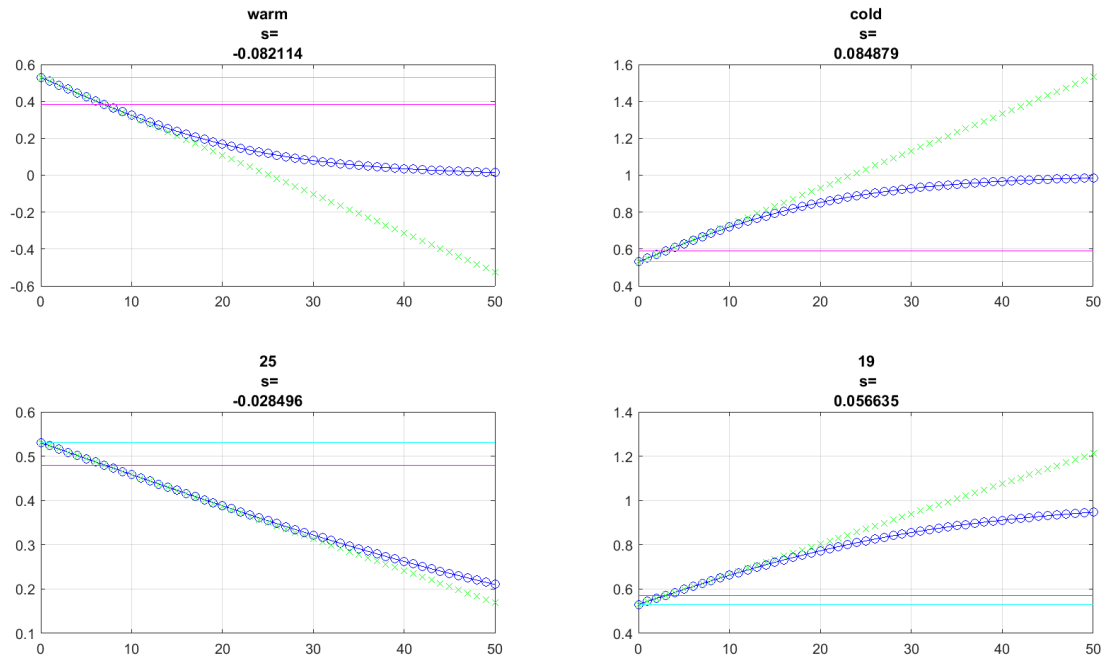

**Figure A1 Estimated change in B mtDNA haplogroup frequency within ATB group extrapolated to 50 generations.**

Blue – iterative solution of equation (1). Green -linearization with an average slope of  $\theta_i/K$ .

Cyan- initial frequency. Magenta -final frequency.

a)

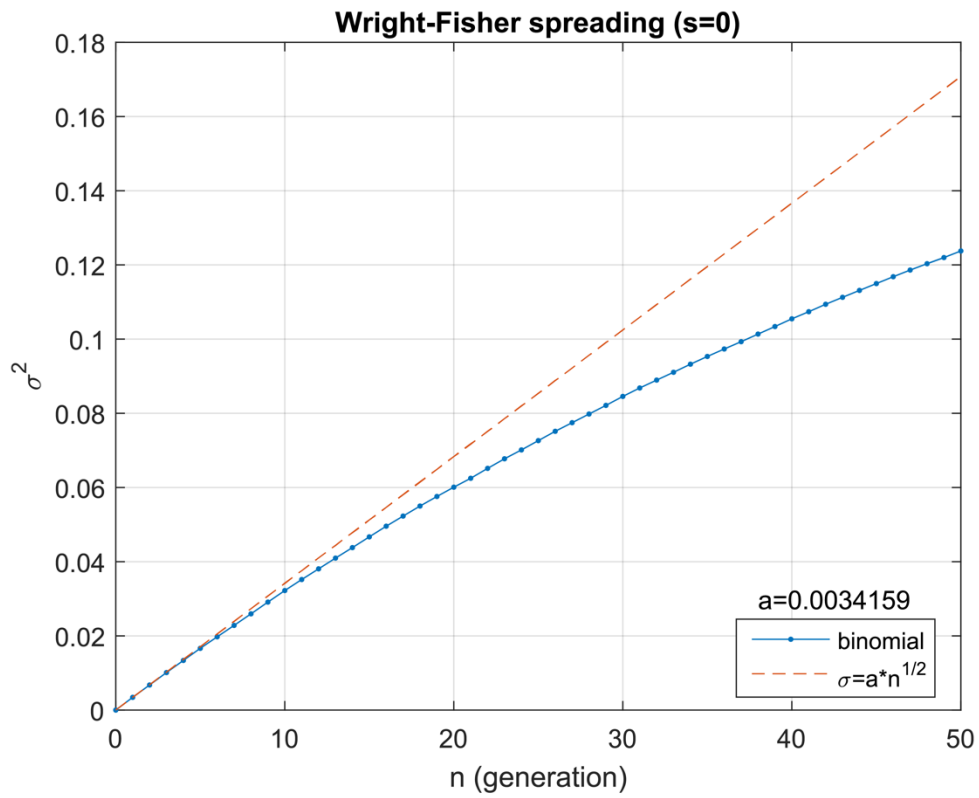

b)

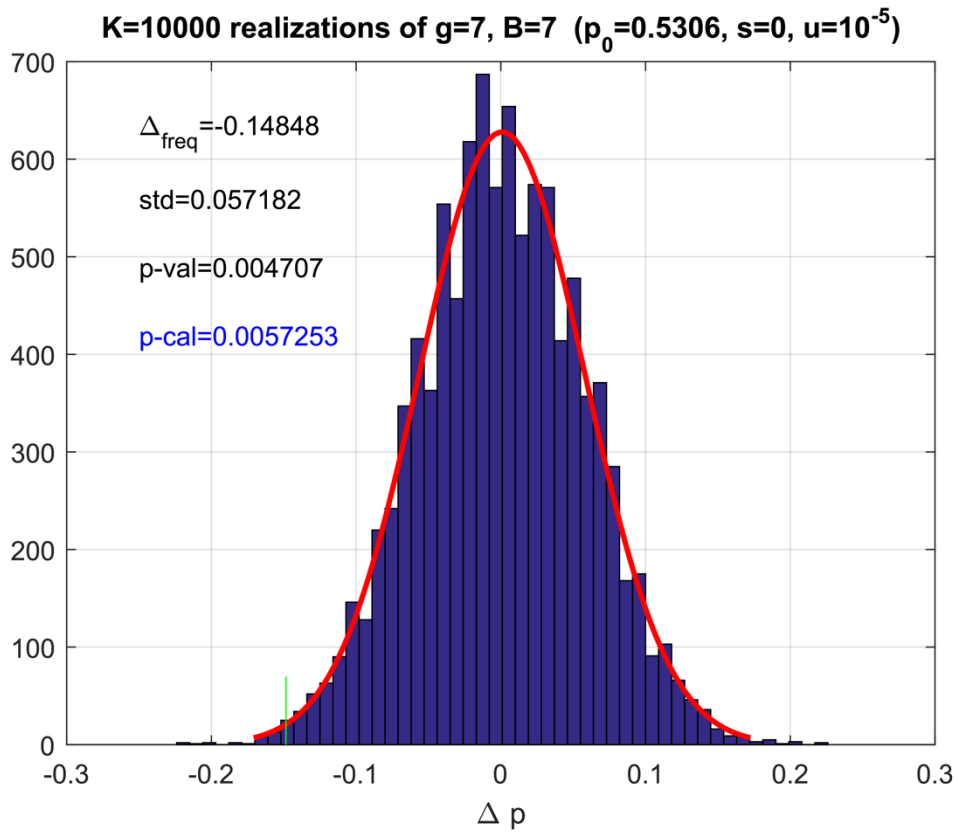

**Figure A2 Examination of genetic drift in fluctuating-warm thermal treatment of our experiment.**

We simulated 10,000 realisations of the Wright-Fisher model [46] (50 generations, 7 replicates, 70 constant female effective population size). The simulation shows that in our experiment (7 generations) spreading due to genetic drift is small and lay well within the range of the diffusion approximation **(a)**. The probability of obtaining a frequency shift of  $\Delta p = -0.14$  (green mark) in the absence of selection ( $s=0$ ) is then  $p\text{-val}=0.0047$ , in good agreement with the diffusive calculation  $p\text{-cal}=0.0057$  **(b)**.

References

[86] Buri, P. Gene frequency in small populations of mutant *Drosophila*. *Evolution* **10**, 367–402 (1956).

[87] Jónás, A., Taus, T., Kosiol, C., Schlotterer, C. & Futschik, A. Estimating the effective population size from temporal allele frequency changes in experimental evolution. *Genetics* **204**, 723-735 (2016).

[88] Nunney, L. The influence of mating system and overlapping generations on effective population size. *Evolution* **47**, 1329-1341 (1993).

**Supplementary Table S1: Fly food composition.**

| <b>Corn flour based fly food</b>                        |     |
|---------------------------------------------------------|-----|
| Water (l)                                               | 1   |
| Agar (g)                                                | 8   |
| Glucose (g)                                             | 100 |
| Corn flour (g)                                          | 45  |
| Dry yeast (g)                                           | 40  |
| Propionic Acid (ml)                                     | 4   |
| 10% Ethanol solution of Butyl p-Hydroxybenzoate<br>(ml) | 3   |
| <b>Potato starch based fly food</b>                     |     |
| Water (l)                                               | 1   |
| Agar (g)                                                | 7   |
| Dextrose (g)                                            | 30  |
| Potato starch (g)                                       | 22  |
| Dry yeast (g)                                           | 35  |
| Propionic Acid (ml)                                     | 5   |
| Nipagen (ml)                                            | 12  |

## Supplementary Table S2: List of samples.

In experimental populations ATB1-ATB7, the ancestors had been exposed to antibiotic treatment, while experimental populations UTR1-UTR8 correspond with untreated flies.

| Experimental population | Thermal regime   | Generation | Sex   | Individuals genotyped | A haplogroup | B haplogroup |
|-------------------------|------------------|------------|-------|-----------------------|--------------|--------------|
| UTR1                    | fluctuating warm | 7          | males | 25                    | 22           | 3            |
| UTR1                    | fluctuating cold | 3          | males | 26                    | 22           | 4            |
| UTR1                    | constant 25°C    | 7          | males | 25                    | 11           | 14           |
| UTR1                    | constant 19°C    | 3          | males | 26                    | 20           | 6            |
| UTR2                    | fluctuating warm | 7          | males | 25                    | 5            | 20           |
| UTR2                    | fluctuating cold | 3          | males | 25                    | 7            | 18           |
| UTR2                    | constant 25°C    | 7          | males | 26                    | 15           | 11           |
| UTR2                    | constant 19°C    | 3          | males | 25                    | 17           | 8            |
| UTR3                    | fluctuating warm | 7          | males | 26                    | 8            | 18           |
| UTR3                    | fluctuating cold | 3          | males | 28                    | 20           | 8            |
| UTR3                    | constant 25°C    | 7          | males | 25                    | 8            | 17           |
| UTR3                    | constant 19°C    | 3          | males | 25                    | 13           | 12           |
| UTR4                    | fluctuating warm | 7          | males | 25                    | 0            | 25           |
| UTR4                    | fluctuating cold | 3          | males | 26                    | 13           | 13           |
| UTR4                    | constant 25°C    | 7          | males | 25                    | 7            | 18           |
| UTR4                    | constant 19°C    | 3          | males | 26                    | 9            | 17           |
| UTR5                    | fluctuating warm | 7          | males | 25                    | 8            | 17           |
| UTR5                    | fluctuating cold | 3          | males | 25                    | 8            | 17           |
| UTR5                    | constant 25°C    | 7          | males | 25                    | 12           | 13           |
| UTR5                    | constant 19°C    | 3          | males | 25                    | 10           | 15           |
| UTR6                    | fluctuating warm | 7          | males | 25                    | 13           | 12           |
| UTR6                    | fluctuating cold | 3          | males | 25                    | 11           | 14           |
| UTR6                    | constant 25°C    | 7          | males | 25                    | 2            | 23           |
| UTR6                    | constant 19°C    | 3          | males | 25                    | 6            | 19           |
| UTR7                    | fluctuating warm | 7          | males | 25                    | 10           | 15           |
| UTR7                    | fluctuating cold | 3          | males | 25                    | 13           | 12           |
| UTR7                    | constant 25°C    | 7          | males | 25                    | 3            | 22           |
| UTR7                    | constant 19°C    | 3          | males | 25                    | 10           | 15           |
| UTR8                    | fluctuating warm | 7          | males | 25                    | 7            | 18           |
| UTR8                    | fluctuating cold | 3          | males | 26                    | 16           | 10           |
| UTR8                    | constant 25°C    | 7          | males | 25                    | 6            | 19           |
| UTR8                    | constant 19°C    | 3          | males | 25                    | 9            | 16           |
| ATB1                    | fluctuating warm | 7          | males | 24                    | 19           | 5            |
| ATB1                    | fluctuating cold | 3          | males | 26                    | 12           | 14           |
| ATB1                    | constant 25°C    | 7          | males | 25                    | 11           | 14           |
| ATB1                    | constant 19°C    | 3          | males | 25                    | 9            | 16           |
| ATB2                    | fluctuating warm | 7          | males | 25                    | 12           | 13           |
| ATB2                    | fluctuating cold | 3          | males | 25                    | 14           | 11           |
| ATB2                    | constant 25°C    | 7          | males | 25                    | 19           | 6            |
| ATB2                    | constant 19°C    | 3          | males | 25                    | 17           | 8            |
| ATB3                    | fluctuating warm | 7          | males | 25                    | 7            | 18           |
| ATB3                    | fluctuating cold | 3          | males | 26                    | 18           | 8            |
| ATB3                    | constant 25°C    | 7          | males | 25                    | 16           | 9            |
| ATB3                    | constant 19°C    | 3          | males | 25                    | 12           | 13           |
| ATB4                    | fluctuating warm | 7          | males | 25                    | 12           | 13           |
| ATB4                    | fluctuating cold | 3          | males | 26                    | 14           | 12           |
| ATB4                    | constant 25°C    | 7          | males | 25                    | 16           | 9            |



|      |                  |   |         |    |    |    |
|------|------------------|---|---------|----|----|----|
| ATB4 | constant 19°C    | 3 | males   | 25 | 10 | 15 |
| ATB5 | fluctuating warm | 7 | males   | 25 | 18 | 7  |
| ATB5 | fluctuating cold | 3 | males   | 25 | 13 | 12 |
| ATB5 | constant 25°C    | 7 | males   | 25 | 9  | 16 |
| ATB5 | constant 19°C    | 3 | males   | 25 | 11 | 14 |
| ATB6 | fluctuating warm | 7 | males   | 25 | 10 | 15 |
| ATB6 | fluctuating cold | 3 | males   | 25 | 13 | 12 |
| ATB6 | constant 25°C    | 7 | males   | 25 | 12 | 13 |
| ATB6 | constant 19°C    | 3 | males   | 26 | 9  | 17 |
| ATB7 | fluctuating warm | 7 | males   | 25 | 8  | 17 |
| ATB7 | fluctuating cold | 3 | males   | 25 | 14 | 11 |
| ATB7 | constant 25°C    | 7 | males   | 25 | 9  | 16 |
| ATB7 | constant 19°C    | 3 | males   | 25 | 15 | 10 |
| UTR1 | fluctuating warm | 7 | females | 25 | 21 | 4  |
| UTR1 | fluctuating cold | 3 | females | 26 | 22 | 4  |
| UTR1 | constant 25°C    | 7 | females | 25 | 14 | 11 |
| UTR1 | constant 19°C    | 3 | females | 25 | 18 | 7  |
| UTR2 | fluctuating warm | 7 | females | 25 | 11 | 14 |
| UTR2 | fluctuating cold | 3 | females | 25 | 7  | 18 |
| UTR2 | constant 25°C    | 7 | females | 25 | 16 | 9  |
| UTR2 | constant 19°C    | 3 | females | 25 | 18 | 7  |
| UTR3 | fluctuating warm | 7 | females | 25 | 6  | 19 |
| UTR3 | fluctuating cold | 3 | females | 25 | 17 | 8  |
| UTR3 | constant 25°C    | 7 | females | 25 | 13 | 12 |
| UTR3 | constant 19°C    | 3 | females | 25 | 11 | 14 |
| UTR4 | fluctuating warm | 7 | females | 25 | 4  | 21 |
| UTR4 | fluctuating cold | 3 | females | 25 | 8  | 17 |
| UTR4 | constant 25°C    | 7 | females | 25 | 11 | 14 |
| UTR4 | constant 19°C    | 3 | females | 25 | 5  | 20 |
| UTR5 | fluctuating warm | 7 | females | 25 | 9  | 16 |
| UTR5 | fluctuating cold | 3 | females | 25 | 8  | 17 |
| UTR5 | constant 25°C    | 7 | females | 25 | 15 | 10 |
| UTR5 | constant 19°C    | 3 | females | 26 | 9  | 17 |
| UTR6 | fluctuating warm | 7 | females | 25 | 10 | 15 |
| UTR6 | fluctuating cold | 3 | females | 25 | 10 | 15 |
| UTR6 | constant 25°C    | 7 | females | 25 | 5  | 20 |
| UTR6 | constant 19°C    | 3 | females | 25 | 6  | 19 |
| UTR7 | fluctuating warm | 7 | females | 25 | 16 | 9  |
| UTR7 | fluctuating cold | 3 | females | 25 | 13 | 12 |
| UTR7 | constant 25°C    | 7 | females | 25 | 10 | 15 |
| UTR7 | constant 19°C    | 3 | females | 26 | 15 | 11 |
| UTR8 | fluctuating warm | 7 | females | 25 | 5  | 20 |
| UTR8 | fluctuating cold | 3 | females | 26 | 17 | 9  |
| UTR8 | constant 25°C    | 7 | females | 25 | 9  | 16 |
| UTR8 | constant 19°C    | 3 | females | 25 | 5  | 20 |
| ATB1 | fluctuating warm | 7 | females | 25 | 18 | 7  |
| ATB1 | fluctuating cold | 3 | females | 26 | 10 | 16 |
| ATB1 | constant 25°C    | 7 | females | 25 | 12 | 13 |
| ATB1 | constant 19°C    | 3 | females | 25 | 10 | 15 |
| ATB2 | fluctuating warm | 7 | females | 25 | 17 | 8  |
| ATB2 | fluctuating cold | 3 | females | 25 | 11 | 14 |
| ATB2 | constant 25°C    | 7 | females | 25 | 12 | 13 |
| ATB2 | constant 19°C    | 3 | females | 25 | 12 | 13 |
| ATB3 | fluctuating warm | 7 | females | 25 | 12 | 13 |
| ATB3 | fluctuating cold | 3 | females | 25 | 14 | 11 |
| ATB3 | constant 25°C    | 7 | females | 25 | 19 | 6  |
| ATB3 | constant 19°C    | 3 | females | 25 | 13 | 12 |
| ATB4 | fluctuating warm | 7 | females | 25 | 19 | 6  |

|                   |                  |      |   |         |      |      |      |
|-------------------|------------------|------|---|---------|------|------|------|
| ATB4              | fluctuating cold |      | 3 | females | 25   | 10   | 15   |
| ATB4              | constant 25°C    |      | 7 | females | 25   | 15   | 10   |
| ATB4              | constant 19°C    |      | 3 | females | 25   | 10   | 15   |
| ATB5              | fluctuating warm |      | 7 | females | 25   | 18   | 7    |
| ATB5              | fluctuating cold |      | 3 | females | 25   | 11   | 14   |
| ATB5              | constant 25°C    |      | 7 | females | 25   | 14   | 11   |
| ATB5              | constant 19°C    |      | 3 | females | 25   | 7    | 18   |
| ATB6              | fluctuating warm |      | 7 | females | 25   | 15   | 10   |
| ATB6              | fluctuating cold |      | 3 | females | 25   | 7    | 18   |
| ATB6              | constant 25°C    |      | 7 | females | 25   | 8    | 17   |
| ATB6              | constant 19°C    |      | 3 | females | 25   | 11   | 14   |
| ATB7              | fluctuating warm |      | 7 | females | 25   | 9    | 16   |
| ATB7              | fluctuating cold |      | 3 | females | 25   | 9    | 16   |
| ATB7              | constant 25°C    |      | 7 | females | 25   | 11   | 14   |
| ATB7              | constant 19°C    |      | 3 | females | 25   | 12   | 13   |
| UTR1              | constant 25°C    |      | 0 | females | 31   | 19   | 12   |
| UTR2              | constant 25°C    |      | 0 | females | 40   | 18   | 22   |
| UTR3              | constant 25°C    |      | 0 | females | 46   | 25   | 21   |
| UTR4              | constant 25°C    |      | 0 | females | 47   | 18   | 29   |
| UTR5              | constant 25°C    |      | 0 | females | 49   | 16   | 33   |
| UTR6              | constant 25°C    |      | 0 | females | 49   | 18   | 31   |
| UTR7              | constant 25°C    |      | 0 | females | 50   | 23   | 27   |
| UTR8              | constant 25°C    |      | 0 | females | 46   | 21   | 25   |
| ATB1              | constant 25°C    |      | 0 | females | 39   | 20   | 19   |
| ATB2              | constant 25°C    |      | 0 | females | 49   | 26   | 23   |
| ATB3              | constant 25°C    |      | 0 | females | 49   | 22   | 27   |
| ATB4              | constant 25°C    |      | 0 | females | 46   | 19   | 27   |
| ATB5              | constant 25°C    |      | 0 | females | 48   | 24   | 24   |
| ATB6              | constant 25°C    |      | 0 | females | 50   | 23   | 27   |
| ATB7              | constant 25°C    |      | 0 | females | 50   | 21   | 29   |
| UTR1              | constant 25°C    |      | 0 | males   | 43   | 22   | 21   |
| UTR2              | constant 25°C    |      | 0 | males   | 39   | 15   | 24   |
| UTR3              | constant 25°C    |      | 0 | males   | 46   | 24   | 22   |
| UTR4              | constant 25°C    |      | 0 | males   | 46   | 11   | 35   |
| UTR5              | constant 25°C    |      | 0 | males   | 44   | 15   | 29   |
| UTR6              | constant 25°C    |      | 0 | males   | 47   | 13   | 34   |
| UTR7              | constant 25°C    |      | 0 | males   | 48   | 23   | 25   |
| UTR8              | constant 25°C    |      | 0 | males   | 47   | 16   | 31   |
| ATB1              | constant 25°C    |      | 0 | males   | 33   | 19   | 14   |
| ATB2              | constant 25°C    |      | 0 | males   | 43   | 21   | 22   |
| ATB3              | constant 25°C    |      | 0 | males   | 42   | 19   | 23   |
| ATB4              | constant 25°C    |      | 0 | males   | 44   | 28   | 16   |
| ATB5              | constant 25°C    |      | 0 | males   | 47   | 21   | 26   |
| ATB6              | constant 25°C    |      | 0 | males   | 48   | 22   | 26   |
| ATB7              | constant 25°C    |      | 0 | males   | 46   | 20   | 26   |
| Townsville<br>(H) | natural          | wild |   | females | 20   | 13   | 7    |
| Melbourne<br>(C)  | natural          | wild |   | females | 20   | 5    | 15   |
| total             |                  |      |   |         | 4410 | 2030 | 2380 |

**Supplementary Table S3: Foundation dates of experimental populations.**

Foundation date marks the date at which virgin flies were combined in a bottle as outlined in Admixture Step 2 (Fig. 1) to form the starting generation. In Admixture Step 1, we allowed their parents to lay eggs for about 1 day, and transferred them to a new bottle. This process was repeated across nine days. We call the process by which we transfer the flies to a new bottle a “tip”. Virgin flies of each sex were sourced from several tips, in order to ensure we had an adequate supply of flies to initiate the experimental populations. We show the dates of maternal ovipositioning and virgin collection in a separate column (date). Number means the number of virgin flies sourced from the tip.

| Experimental population | Foundation | Virgins type |    | Virgins source |               |        |     |               |        |     |              |        |
|-------------------------|------------|--------------|----|----------------|---------------|--------|-----|---------------|--------|-----|--------------|--------|
|                         |            |              |    | tip            | date          | number | tip | date          | number | tip | date         | number |
| UTR1                    | 27.3.2013  | males        | WC | 1              | 5.-16.3.2013  | 25     | 2   | 7.-19.3.2013  | 8      |     |              |        |
|                         |            | females      | WC | 1              | 5.-16.3.2013  | 17     |     |               |        |     |              |        |
|                         |            | males        | CW | 1              | 5.-16.3.2013  | 25     |     |               |        |     |              |        |
|                         |            | females      | CW | 1              | 5.-16.3.2013  | 25     |     |               |        |     |              |        |
| UTR2                    | 27.3.2013  | males        | WC | 2              | 7.-19.3.2013  | 25     | 1   | 5.-18.3.2013  | 11     |     |              |        |
|                         |            | females      | WC | 2              | 7.-19.3.2013  | 14     |     |               |        |     |              |        |
|                         |            | males        | CW | 2              | 7.-19.3.2013  | 25     |     |               |        |     |              |        |
|                         |            | females      | CW | 2              | 7.-19.3.2013  | 14     |     |               |        |     |              |        |
| UTR3                    | 5.4.2013   | females      | WC | 3              | 11.-21.3.2013 | 25     |     |               |        |     |              |        |
|                         |            | males        | WC | 3              | 11.-21.3.2013 | 25     |     |               |        |     |              |        |
|                         |            | females      | CW | 3              | 11.-21.3.2013 | 25     |     |               |        |     |              |        |
|                         |            | males        | CW | 3              | 11.-21.3.2013 | 25     |     |               |        |     |              |        |
| UTR4                    | 5.4.2013   | females      | WC | 3              | 11.-21.3.2013 | 25     |     |               |        |     |              |        |
|                         |            | males        | WC | 3              | 11.-21.3.2013 | 25     |     |               |        |     |              |        |
|                         |            | females      | CW | 3              | 11.-21.3.2013 | 25     |     |               |        |     |              |        |
|                         |            | males        | CW | 3              | 11.-21.3.2013 | 25     |     |               |        |     |              |        |
| UTR5                    | 5.4.2013   | females      | WC | 3              | 11.-21.3.2013 | 25     |     |               |        |     |              |        |
|                         |            | males        | WC | 3              | 11.-21.3.2013 | 25     |     |               |        |     |              |        |
|                         |            | females      | CW | 3              | 11.-21.3.2013 | 25     |     |               |        |     |              |        |
|                         |            | males        | CW | 3              | 11.-21.3.2013 | 25     |     |               |        |     |              |        |
| UTR6                    | 5.4.2013   | females      | WC | 4              | 12.-22.3.2013 | 15     | 5   | 12.-23.3.2013 | 10     |     |              |        |
|                         |            | males        | WC | 4              | 12.-22.3.2013 | 23     |     |               |        |     |              |        |
|                         |            | females      | CW | 4              | 12.-22.3.2013 | 15     |     |               |        |     |              |        |
|                         |            | males        | CW | 4              | 12.-22.3.2013 | 23     |     |               |        |     |              |        |
| UTR7                    | 5.4.2013   | females      | WC | 6              | 13.-23.3.2013 | 18     | 6   | 13.-22.3.2013 | 7      |     |              |        |
|                         |            | males        | WC | 6              | 13.-22.3.2013 | 14     |     |               |        |     |              |        |
|                         |            | females      | CW | 6              | 13.-23.3.2013 | 18     |     |               |        |     |              |        |
|                         |            | males        | CW | 6              | 13.-22.3.2013 | 14     |     |               |        |     |              |        |
| UTR8                    | 5.4.2013   | females      | WC | 4              | 12.-22.3.2013 | 12     | 3   | 11.-21.3.2013 | 13     |     |              |        |
|                         |            | males        | WC | 6              | 13.-23.3.2013 | 25     |     |               |        |     |              |        |
|                         |            | females      | CW | 4              | 12.-22.3.2013 | 12     |     |               |        |     |              |        |
|                         |            | males        | CW | 6              | 13.-23.3.2013 | 25     |     |               |        |     |              |        |
| ATB1                    | 27.3.2013  | females      | WC | 1              | 5.-16.3.2013  | 7      | 2   | 7.-19.3.2013  | 4      | 1   | 5.-18.3.2013 | 14     |
|                         |            | males        | WC | 1              | 5.-16.3.2013  | 13     |     |               |        |     |              |        |
|                         |            | females      | CW | 1              | 5.-16.3.2013  | 7      |     |               |        |     |              |        |
|                         |            | males        | CW | 1              | 5.-16.3.2013  | 13     |     |               |        |     |              |        |
| ATB2                    | 4.4.2013   | females      | WC | 3              | 11.-21.3.2013 | 25     |     |               |        |     |              |        |
|                         |            | males        | WC | 3              | 11.-21.3.2013 | 25     |     |               |        |     |              |        |
|                         |            | females      | CW | 3              | 11.-21.3.2013 | 25     |     |               |        |     |              |        |
|                         |            | males        | CW | 3              | 11.-21.3.2013 | 25     |     |               |        |     |              |        |
| ATB3                    | 4.4.2013   | females      | WC | 3              | 11.-21.3.2013 | 25     |     |               |        |     |              |        |
|                         |            | males        | WC | 3              | 11.-21.3.2013 | 25     |     |               |        |     |              |        |
|                         |            | females      | CW | 3              | 11.-21.3.2013 | 25     |     |               |        |     |              |        |
|                         |            | males        | CW | 3              | 11.-21.3.2013 | 25     |     |               |        |     |              |        |
| ATB4                    | 4.4.2013   | females      | WC | 3              | 11.-21.3.2013 | 25     |     |               |        |     |              |        |
|                         |            | males        | WC | 3              | 11.-21.3.2013 | 25     |     |               |        |     |              |        |
|                         |            | females      | CW | 3              | 11.-21.3.2013 | 25     |     |               |        |     |              |        |
|                         |            | males        | CW | 3              | 11.-21.3.2013 | 25     |     |               |        |     |              |        |
| ATB5                    | 4.4.2013   | females      | WC | 4              | 12.-22.3.2013 | 25     |     |               |        |     |              |        |
|                         |            | males        | WC | 4              | 12.-22.3.2013 | 25     |     |               |        |     |              |        |
|                         |            | females      | CW | 4              | 12.-22.3.2013 | 25     |     |               |        |     |              |        |
|                         |            | males        | CW | 4              | 12.-22.3.2013 | 25     |     |               |        |     |              |        |
| ATB6                    | 4.4.2013   | females      | WC | 6              | 13.-23.3.2013 | 25     |     |               |        |     |              |        |
|                         |            | males        | WC | 6              | 13.-23.3.2013 | 25     |     |               |        |     |              |        |
|                         |            | females      | CW | 6              | 13.-23.3.2013 | 25     |     |               |        |     |              |        |
|                         |            | males        | CW | 6              | 13.-23.3.2013 | 25     |     |               |        |     |              |        |
| ATB7                    | 4.4.2013   | females      | WC | 6              | 13.-23.3.2013 | 25     |     |               |        |     |              |        |
|                         |            | males        | WC | 6              | 13.-23.3.2013 | 25     |     |               |        |     |              |        |
|                         |            | females      | CW | 6              | 13.-23.3.2013 | 25     |     |               |        |     |              |        |
|                         |            | males        | CW | 6              | 13.-23.3.2013 | 25     |     |               |        |     |              |        |



**Supplementary Table S5: Selected SNPs characteristics for mtDNA haplogroups.**

Red colour marks the site recognized by *HinfI* restriction enzyme used for haplogroups recognition by Boussy et al. in 1998 [47] in the A haplogroup that appears more frequent in warmer areas of Australia [24].

| SNP code<br>(position) | SNP type | Gene | Aminoacid     | Position<br>in triplet | A<br>haplogroup | B<br>haplogroup |
|------------------------|----------|------|---------------|------------------------|-----------------|-----------------|
| 1154                   | C/T      | ND2  | Asparagine    | 3                      | C               | T               |
| 2661                   | C/T      | COX1 | Proline       | 3                      | C               | T               |
| 3583                   | C/T      | COX2 | Alanine       | 3                      | T               | C               |
| 4247                   | C/T      | ATP6 | Glycine       | 3                      | C               | T               |
| 5396                   | C/T      | COX3 | Leucine       | 1                      | C               | T               |
| 6299                   | A/C      | trnE | -             | -                      | C               | A               |
| 6980                   | A/G      | ND5  | Tyrosine      | 3                      | G               | A               |
| 7862                   | A/G      | ND5  | Phenylalanine | 3                      | G               | A               |
| 8867                   | A/G      | ND4  | Leucine       | 1                      | A               | G               |
| 8973                   | C/T      | ND4  | Leucine       | 3                      | C               | T               |
| 10217                  | C/T      | ND6  | Leucine       | 1                      | C               | T               |
| 10673                  | C/T      | CYTB | Leucine       | 1                      | T               | C               |
| 12123                  | C/T      | ND1  | Methionine    | 3                      | C               | T               |
| 12336                  | A/C      | ND1  | Glycine       | 3                      | C               | A               |
